# Supplementary material for: Neonatal nasogastric tube feeding in a low-resource African setting – using ergonomics methods to explore quality and safety issues in task sharing
Source: PubMed Central journal article supplement (PMC6240229; doi:10.1186/s12912-018-0314-y), 2018-11-16
Supplement: 12912_2018_314_MOESM1_ESM.pdf [file 12912_2018_314_MOESM1_ESM.pdf]

**Table S2: Systematic human error reduction and prediction approach analysis table of the 47-nasogastric tube feeding tasks.**

| SHERPA - NASOGASTRIC TUBE FEEDING |                                                                                                |                                     |                                                                           |                                                   |          |                                          |                                         |                                                                        |
|-----------------------------------|------------------------------------------------------------------------------------------------|-------------------------------------|---------------------------------------------------------------------------|---------------------------------------------------|----------|------------------------------------------|-----------------------------------------|------------------------------------------------------------------------|
| Task step                         | Task                                                                                           | Error Mode                          | Error Description                                                         | Consequences                                      | Recovery | Probability (P) 1 -Low, 2-Medium, 3-High | Criticality (C) 1-Low, 2-Medium, 3-High | Remedial Measures                                                      |
| 1.1.1                             | Explain procedure and goal of procedure to mother                                              | A9: Operation omitted               | Procedure not explained to mother                                         | Mother unaware of procedure and goal of procedure | NA       | 1                                        | 1                                       | Continuous Medical Education (CME) on NGT feeding                      |
| 1.1.2                             | Obtain parental consent/permission                                                             | A9: Operation omitted               | Failure to obtain consent                                                 | Operation performed without consent               | 1.1.1    | 2                                        | 1                                       | Continuous Medical Education (CME) on NGT feeding                      |
| 1.2.1                             | Locate the trolley                                                                             | A1: Operation too long              | Taking too much time to locate the trolley                                | Trolley not located in time                       | NA       | 2                                        | 1                                       | Have trolleys stored in a specific area                                |
| 1.2.1                             | Locate the trolley                                                                             | A7: Right operation on wrong object | Locate a trolley but a wrong one                                          | Wrong trolley obtained                            | NA       | 2                                        | 2                                       | Label trolleys; use a labelled trolley; use two trays or sterile field |
| 1.2.1                             | Locate the trolley                                                                             | A9: Operation omitted               | Failure to locate trolley                                                 | No trolley for setting up feeding equipment       | NA       | 2                                        | 1                                       | Clear guidelines on use of trolleys for NGT feeding                    |
| 1.2.2                             | Wipe entire trolley clean with spirit swab                                                     | A10: Operation incomplete           | Failure to wipe the entire trolley                                        | Trolley not entirely cleaned                      | 1.2.1    | 2                                        | 2                                       | Periodic reference to the procedure manual on how to clean trolleys    |
| 1.2.2                             | Wipe entire trolley clean with spirit swab                                                     | A9: Operation omitted               | Failure to wipe the trolley                                               | Trolley not cleaned                               | 1.2.2    | 2                                        | 2                                       | Periodic reference to the procedure manual on how to clean trolleys    |
| 1.2.3.1                           | Put milk jar, feed, calibrated cups and 2 syringes on the top shelf                            | A9: Operation omitted               | Failure to put equipment on trolley                                       | No feeding equipment on trolley                   | 1.2.2    | 2                                        | 2                                       | Provide a list of equipment needed for NGT feeding in preparation room |
| 1.2.3.1                           | Put milk jar, feed, calibrated cups and 2 syringes on the top shelf                            | A10: Operation incomplete           | Failure to set all the equipment required on the top shelf of the trolley | Some feeding equipment missing on trolley         | 1.2.2    | 2                                        | 2                                       | Provide a list of equipment needed for NGT feeding in preparation room |
| 1.2.3.2                           | Put cotton swabs, clean linen, receiver for gastric content and used items on the bottom shelf | A9: Operation omitted               | Failure to put the equipment required on the bottom shelf of the trolley  | Feeding equipment missing on trolley              | 1.2.3.1  | 2                                        | 2                                       | Provide a list of equipment needed for NGT feeding in preparation room |
| 1.2.3.2                           | Put cotton swabs, clean linen, receiver for gastric                                            | A10: Operation incomplete           | Failure to set all the equipment required on                              | Some feeding equipment missing on trolley         | 1.2.3.1  | 2                                        | 2                                       | Provide a list of equipment needed for NGT feeding in preparation room |

|         |                                                        |                       |                                                          |                                                                                        |                  |   |   |                                                                                                  |
|---------|--------------------------------------------------------|-----------------------|----------------------------------------------------------|----------------------------------------------------------------------------------------|------------------|---|---|--------------------------------------------------------------------------------------------------|
|         | content and used items on the bottom shelf             |                       | the bottom shelf of the trolley                          |                                                                                        |                  |   |   |                                                                                                  |
| 1.2.4   | Confirm if all equipment/materials are on trolley      | C1: Check omitted     | Failure to check if the equipment are on the trolley     | Equipment not checked if on the trolley therefore no feeding equipment on the trolley  | 1.2.3.1, 1.2.3.2 | 2 | 2 | Provide a list of equipment needed for NGT feeding in preparation room                           |
| 1.2.4   | Confirm if all equipment/materials are on trolley      | C2: Check incomplete  | Failure to check if all the equipment are on the trolley | Not all equipment checked if on the trolley therefore some might be missing            | 1.2.3.1, 1.2.3.3 | 2 | 2 | Provide a list of equipment needed for NGT feeding in preparation room                           |
| 1.3.1   | Switch on lights, raise window curtains                | A9: Operation omitted | Failure to switch on lights, raise window curtains       | Not enough light in the room                                                           | NA               | 1 | 1 | Assign this activity to subordinate in charge of cleaning                                        |
| 1.3.2   | Screen bed/cot for privacy                             | A9: Operation omitted | Failure to screen bed/cot for privacy                    | No privacy attained                                                                    | NA               | 1 | 1 | Assign this activity to subordinate in charge of cleaning                                        |
| 1.3.3   | Remove any obstacles around baby's cot                 | A9: Operation omitted | Failure to remove any obstacles around baby's cot        | Unsafe feeding environment due to clutter or obstacles                                 | NA               | 1 | 1 | Assign this activity to subordinate in charge of cleaning                                        |
| 1.4.1   | Position baby to a slightly elevated position (supine) | A9: Operation omitted | Failure to position baby correctly before feeding        | Baby not positioned properly for feeding                                               | NA               | 1 | 1 | CMEs on NGT feeding                                                                              |
| 1.4.2   | Clean/wipe any oral nasal secretions                   | A9: Operation omitted | Oral/nasal secretions not cleaned                        | Possible contamination of feed                                                         | NA               | 2 | 2 | CMEs on NGT feeding                                                                              |
| 1.4.3.1 | Touch the baby                                         | A9: Operation omitted | Failure to touch baby                                    |                                                                                        | NA               | 1 | 1 | CMEs on NGT feeding and importance of comfort care to patients                                   |
| 1.4.3.2 | Talk to the baby                                       | A9: Operation omitted | Failure to talk to baby                                  |                                                                                        | NA               | 1 | 1 | CMEs on NGT feeding and the importance of communication (verbal/nor-verbal) while providing care |
| 1.4.4.1 | Kink NG-tube                                           | A9: Operation omitted | Failure to kink NGT                                      | Tube not kinked, therefore air enters into the tube                                    | NA               | 2 | 1 | CMEs on NGT feeding                                                                              |
| 1.4.4.2 | Open tip of the tube                                   | A9: Operation omitted | Failure to open tip of tube                              | Tip of tube not open therefore cannot insert syringe                                   | NA               | 1 | 1 | CMEs on NGT feeding                                                                              |
| 1.4.4.3 | Attach syringe                                         | A9: Operation omitted | Failure to attach syringe                                | Syringe not attached                                                                   | NA               | 1 | 1 | CMEs on NGT feeding                                                                              |
| 1.4.4.4 | Remove kink                                            | A9: Operation omitted | Failure to remove kink                                   | Kink not removed therefore cannot pull plunger to draw gastric contents for assessment | NA               | 1 | 1 | CMEs on NGT feeding                                                                              |

|          |                                                          |                       |                                                                     |                                                                                                  |         |   |   |                                                                   |
|----------|----------------------------------------------------------|-----------------------|---------------------------------------------------------------------|--------------------------------------------------------------------------------------------------|---------|---|---|-------------------------------------------------------------------|
| 1.4.4.5  | Pull plunger                                             | A9: Operation omitted | Failure to pull plunger                                             | Plunger not pulled therefore cannot withdraw stomach contents                                    |         | 2 | 2 | CMEs on NGT feeding                                               |
| 1.4.4.6  | Assess gastric content type and volume                   | A9: Operation omitted | Gastric assessment not done                                         | Incorrect measure of feed given/Feed given when not necessary                                    | NA      | 2 | 2 | CMEs on NGT feeding                                               |
| 1.4.4.7  | Slowly push back gastric contents                        | A9: Operation omitted | Failure to push gastric contents back                               |                                                                                                  |         |   |   | CMEs on NGT feeding                                               |
| 1.4.4.8  | Kink NG-tube                                             | A9: Operation omitted | Failure to kink NGT                                                 | Tube not kinked, therefore air enters into the tube                                              | NA      | 2 | 1 |                                                                   |
| 1.4.4.9  | Remove syringe                                           | A9: Operation omitted | Failure to remove syringe                                           | Syringe not removed therefore cannot replace lid                                                 | 1.4.4.8 | 1 | 1 | CMEs on NGT feeding                                               |
| 1.4.4.10 | Replace NG-tube lid                                      | A9: Operation omitted | Failure to replace NGT lid                                          | Tube not closed, therefore air enters the tube                                                   | 1.4.4.9 | 1 | 1 | CMEs on NGT feeding                                               |
| 2.1      | Review/check prescribed feed to determine amount of feed | C1: Check omitted     | Failure to review/check prescribed feed to determine amount of feed | Feed prescribed and amount not checked                                                           | 2.6     | 2 | 2 | Avail a list of steps to be followed while conducting NGT feeding |
| 2.2      | Remove plunger from syringe                              | A9: Operation omitted | Failure to remove plunger from syringe                              | Plunger retained in syringe, cannot pour feed into the barrel                                    | 2.6     | 1 | 1 | Avail a list of steps to be followed while conducting NGT feeding |
| 2.3      | Kink tube                                                | A9: Operation omitted | Failure to kink NGT                                                 | Tube not kinked, therefore air enters into the tube                                              | 2.2     | 2 | 1 | Avail a list of steps to be followed while conducting NGT feeding |
| 2.4      | Remove tip covering NGT                                  | A9: Operation omitted | Failure to remove tip covering NGT                                  | Tube not opened, unable to insert syringe                                                        | 2.3     | 2 | 1 | Avail a list of steps to be followed while conducting NGT feeding |
| 2.5      | Insert syringe to tip of NGT                             | A9: Operation omitted | Failure to insert syringe                                           | Syringe not inserted to the tip of NGT therefore cannot pour feed into the barrel of the syringe | 2.7     | 1 | 1 | Avail a list of steps to be followed while conducting NGT feeding |
| 2.6      | Pour feed into syringe barrel                            | A9: Operation omitted | Failure to pour feed                                                | No feed poured therefore cannot assess speed of flow                                             | 2.1     | 1 | 1 | Avail a list of steps to be followed while conducting NGT feeding |
| 2.7      | Release kink                                             | A9: Operation omitted | Failure to release kink                                             | Tube kinked, feed unable to flow                                                                 | 2.8     | 1 | 1 | Avail a list of steps to be followed while conducting NGT feeding |
| 2.8      | Allow feed to flow by gravity                            | A9: Operation omitted | Failure to allow feed to flow by gravity                            | Feed not flowing                                                                                 | 2.9     | 2 | 2 | Avail a list of steps to be followed while conducting NGT feeding |
| 2.9      | Check if feed is flowing                                 | C1: Check omitted     | Failure to check if feed is flowing                                 | Feed not flowing                                                                                 | 2.8     | 2 | 2 | Avail a list of steps to be followed while conducting NGT feeding |
| 2.10     | Detach syringe from NGT                                  | A9: Operation omitted | Failure to detach syringe from NGT                                  | Unable to close tip of tube                                                                      | 2.12    | 1 | 1 | Avail a list of steps to be followed while conducting NGT feeding |
| 2.11     | Close tip of NGT                                         | A9: Operation omitted | Failure to close tip of tube                                        | Tube left open therefore air enters the tube                                                     | 3.2     | 1 | 1 | Avail a list of steps to be followed while conducting NGT feeding |

|     |                                                       |                       |                                                                 |                                                                        |     |   |   |                                                                   |
|-----|-------------------------------------------------------|-----------------------|-----------------------------------------------------------------|------------------------------------------------------------------------|-----|---|---|-------------------------------------------------------------------|
| 3.1 | Wipe any secretions or spillages                      | A9: Operation omitted | Failure to wipe secretions and spillages                        | Baby left untidy                                                       | NA  | 1 | 1 | Avail a list of steps to be followed while conducting NGT feeding |
| 3.2 | Secure NGT using adhesive tape                        | A9: Operation omitted | Failure to secure NGT                                           | Risk of dislodging NGT                                                 | 3.3 | 2 | 2 | Avail a list of steps to be followed while conducting NGT feeding |
| 3.3 | Reposition baby to lateral position                   | A9: Operation omitted | Failure to reposition baby                                      | Baby wrongly positioned, risk of regurgitation complications           | 3.4 | 2 | 2 | Avail a list of steps to be followed while conducting NGT feeding |
| 3.4 | Cover baby                                            | A9: Operation omitted | Failure to cover baby                                           | Baby exposed to cold                                                   | NA  | 1 | 1 | Avail a list of steps to be followed while conducting NGT feeding |
| 3.5 | Thank baby and mother                                 | A9: Operation omitted | Failure to thank baby and mother                                |                                                                        | NA  | 1 | 1 | Avail a list of steps to be followed while conducting NGT feeding |
| 4.1 | Take all dirty utensils to disinfection corner/room   | A9: Operation omitted | Failure to take all dirty utensils to disinfection corner/room  | Dirty utensils not taken to disinfection corner/room                   | NA  | 1 | 1 | Avail a list of steps to be followed while conducting NGT feeding |
| 4.2 | Discard wastes according to waste disposal guidelines | A9: Operation omitted | Failure to discard waste according to waste disposal guidelines | Waste not discarded as per policy, risk of contamination and infection | NA  | 2 | 2 | Avail a list of steps to be followed while conducting NGT feeding |
| 4.3 | Clean trolley                                         | A9: Operation omitted | Failure to clean trolley                                        | Trolley not cleaned, risk of cross contamination                       | NA  | 2 | 2 | Avail a list of steps to be followed while conducting NGT feeding |
| 4.4 | Return trolley to procedure room                      | A9: Operation omitted | Failure to return trolley to procedure room                     |                                                                        | NA  | 2 | 2 | Avail a list of steps to be followed while conducting NGT feeding |
| 5.1 | Document procedure in feeding chart                   | A9: Operation omitted | Documentation not done in feeding chart                         | No records of the procedure in the feeding chart for reference         | 5.2 | 2 | 2 | Avail a list of steps to be followed while conducting NGT feeding |
| 5.2 | Document procedure in cardex                          | A9: Operation omitted | Documentation not done in cardex                                | No records of the procedure in the cardex for reference                | NA  | 2 | 2 | Avail a list of steps to be followed while conducting NGT feeding |
