# Supplementary material for: Neonatal nasogastric tube feeding in a low-resource African setting – using ergonomics methods to explore quality and safety issues in task sharing
Source: PubMed Central journal article supplement (PMC6240229; doi:10.1186/s12912-018-0314-y), 2018-11-16
Supplement: 12912_2018_314_MOESM4_ESM.pdf [file 12912_2018_314_MOESM4_ESM.pdf]

**Table S1:** Systematic human error reduction and prediction approach (SHERPA) table of selected tasks assigned medium probability and criticality levels showing risks and supervision levels as reported by subject matter experts.

| Task    | Shared with                                                                                    | Number of SMEs reporting sharing of this task with mother/casual | Number of SMEs reporting this task was often missed | Error mode & description | Consequences                                                                                    | Risk level as reported by SMEs                                                        | Supervision level | Remedial Measures |                                                                        |
|---------|------------------------------------------------------------------------------------------------|------------------------------------------------------------------|-----------------------------------------------------|--------------------------|-------------------------------------------------------------------------------------------------|---------------------------------------------------------------------------------------|-------------------|-------------------|------------------------------------------------------------------------|
| 1.2.1   | Locate the trolley                                                                             | Casual                                                           | 2                                                   | 0                        | A7: Right operation on wrong object; Locate a trolley but a wrong one                           | Wrong trolley obtained                                                                | Medium            | Medium            | Label trolleys; use a labelled trolley; use two trays or sterile field |
| 1.2.2   | Wipe entire trolley clean with spirit swab                                                     | Mother                                                           | 0                                                   | 0                        | A9: Operation omitted; Failure to wipe the trolley                                              | Trolley not cleaned                                                                   | Medium            | Medium            | Periodic reference to the procedure manual on how to clean trolleys    |
| 1.2.3.1 | Put milk jar, feed, calibrated cups and 2 syringes on the top shelf                            | Mother /casual                                                   | 2/2                                                 | 1                        | A9: Operation omitted; Failure to put equipment on trolley                                      | No feeding equipment on trolley                                                       | Low               | High              | Provide a list of equipment needed for NGT feeding in preparation room |
| 1.2.3.2 | Put cotton swabs, clean linen, receiver for gastric content and used items on the bottom shelf | Mother                                                           | 1                                                   | 4                        | A9: Operation omitted; Failure to put the equipment required on the bottom shelf of the trolley | Feeding equipment missing on trolley                                                  | Low               | Low               | Provide a list of equipment needed for NGT feeding in preparation room |
| 1.2.4   | Confirm if all equipment/materials are on trolley                                              | Casual                                                           | 1                                                   | 1                        | C1: Check omitted; Failure to check if the equipment is on the trolley                          | Equipment not checked if on the trolley therefore no feeding equipment on the trolley | Medium            | Low               | Provide a list of equipment needed for NGT feeding in preparation room |
| 1.4.2   | Clean/wipe any oral nasal secretions                                                           | Mother                                                           | 5                                                   | 2                        | A9: Operation omitted; Oral/nasal secretions not cleaned                                        | Possible contamination of feed                                                        | Low               | High              | CMEs on NGT feeding                                                    |
| 1.4.4.5 | Pull plunger                                                                                   | Mother                                                           | 3                                                   | 1                        | A9: Operation omitted; Failure to pull plunger                                                  | Plunger not pulled therefore cannot withdraw stomach contents                         | Low               | Medium            |                                                                        |
| 1.4.4.6 | Assess gastric content type and volume                                                         | Mother                                                           | 4                                                   | 2                        | A9: Operation omitted; Gastric assessment not done                                              | Incorrect measure of feed given/Feed given when not necessary                         | Low               | High              | CMEs on NGT feeding                                                    |
| 1.4.4.7 | Slowly push back gastric contents                                                              | Mother                                                           | 4                                                   | 2                        | A9: Operation omitted; Failure to                                                               |                                                                                       | Low               | High              |                                                                        |

|     |                                                          |                |     |   |  |                                                                                        |                                                                        |        |        |                                                                   |
|-----|----------------------------------------------------------|----------------|-----|---|--|----------------------------------------------------------------------------------------|------------------------------------------------------------------------|--------|--------|-------------------------------------------------------------------|
|     |                                                          |                |     |   |  |                                                                                        | push gastric contents back                                             |        |        |                                                                   |
| 2.1 | Review/check prescribed feed to determine amount of feed | Mother         | 1   | 0 |  | C1: Check omitted; Failure to review/check prescribed feed to determine amount of feed | Feed prescribed and amount not checked                                 | Medium | High   | Avail a list of steps to be followed while conducting NGT feeding |
| 2.8 | Allow feed to flow by gravity                            | Mother         | 6   | 0 |  | A9: Operation omitted; Failure to allow feed to flow by gravity                        | Feed not flowing                                                       | Medium | High   | Avail a list of steps to be followed while conducting NGT feeding |
| 2.9 | Check if feed is flowing                                 | Mother         | 5   | 0 |  | C1: Check omitted; Failure to check if feed is flowing                                 | Feed not flowing                                                       | Medium | High   | Avail a list of steps to be followed while conducting NGT feeding |
| 3.2 | Secure NGT using adhesive tape                           | Mother         | 3   | 0 |  | A9: Operation omitted; Failure to secure NGT                                           | Risk of dislodging NGT                                                 | Medium | Medium | Avail a list of steps to be followed while conducting NGT feeding |
| 3.3 | Reposition baby to lateral position                      | Mother         | 5   | 0 |  | A9: Operation omitted; Failure to reposition baby                                      | Baby wrongly positioned, risk of regurgitation complications           | Medium | High   | Avail a list of steps to be followed while conducting NGT feeding |
| 4.2 | Discard wastes according to waste disposal guidelines    | Mother /casual | 2/4 | 1 |  | A9: Operation omitted; Failure to discard waste according to waste disposal guidelines | Waste not discarded as per policy, risk of contamination and infection | Medium | Medium | Avail a list of steps to be followed while conducting NGT feeding |
| 4.3 | Clean trolley                                            | Casual         | 3   | 2 |  | A9: Operation omitted; Failure to clean trolley                                        | Trolley not cleaned, risk of cross contamination                       | Medium | Medium | Avail a list of steps to be followed while conducting NGT feeding |
| 4.4 | Return trolley to procedure room                         | Casual         | 3   | 3 |  | A9: Operation omitted; Failure to return trolley to procedure room                     |                                                                        | Medium | Low    | Avail a list of steps to be followed while conducting NGT feeding |
| 5.1 | Document procedure in feeding chart                      | Mother         | 4   | 0 |  | A9: Operation omitted; Documentation not done in feeding chart                         | No records of the procedure in the feeding chart for reference         | Medium | High   | Avail a list of steps to be followed while conducting NGT feeding |
| 5.2 | Document procedure in cardex                             | Mother         | 1   | 1 |  | A9: Operation omitted; Documentation not done in cardex                                | No records of the procedure in the cardex for reference                | Medium | Medium | Avail a list of steps to be followed while conducting NGT feeding |

**KEY**

Tasks reported as shared with mothers/casuals by half or more of the SME

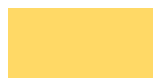

Tasks reported as being missed by half or more of the SMEs
